# Supplementary material
Source: PubMed Central journal article supplement (PMC9869182)
Supplement: NIHMS1864332-supplement-1.pdf [file NIHMS1864332-supplement-1.pdf]

## Supplementary Materials

**Table S1. Psychiatric ICD-10-CM Code Classifications**

| Diagnosis Category                                             | Included ICD-10-CM Codes                                                                                                                                                                                                                                                                                                                                                                                                                                                                                                                                                                                                                                                                                                                                                                                                                                                                                                                                                                                                                                                                                                                                                                                                                                                                                                                                                                                                                                                                                                                                                                                                                                                                                                                                                                                                                                                                                                                                                                                              |
|----------------------------------------------------------------|-----------------------------------------------------------------------------------------------------------------------------------------------------------------------------------------------------------------------------------------------------------------------------------------------------------------------------------------------------------------------------------------------------------------------------------------------------------------------------------------------------------------------------------------------------------------------------------------------------------------------------------------------------------------------------------------------------------------------------------------------------------------------------------------------------------------------------------------------------------------------------------------------------------------------------------------------------------------------------------------------------------------------------------------------------------------------------------------------------------------------------------------------------------------------------------------------------------------------------------------------------------------------------------------------------------------------------------------------------------------------------------------------------------------------------------------------------------------------------------------------------------------------------------------------------------------------------------------------------------------------------------------------------------------------------------------------------------------------------------------------------------------------------------------------------------------------------------------------------------------------------------------------------------------------------------------------------------------------------------------------------------------------|
| Schizophrenia spectrum and other psychotic disorders           | F06.0, F06.1, F06.2, F20.0, F20.1, F20.2, F20.3, F20.5, F20.81, F20.89, F20.9, F22, F23, F24, F25.0, F25.1, F25.8, F25.9, F28, F29                                                                                                                                                                                                                                                                                                                                                                                                                                                                                                                                                                                                                                                                                                                                                                                                                                                                                                                                                                                                                                                                                                                                                                                                                                                                                                                                                                                                                                                                                                                                                                                                                                                                                                                                                                                                                                                                                    |
| Depressive disorders                                           | F06.31, F06.32, F32.0, F32.1, F32.2, F32.3, F32.4, F32.8, F32.81, F32.89, F32.9, F32.A, F33.0, F33.1, F33.2, F33.3, F33.41, F33.8, F33.9, F34.1, F32.5, F33.40, F33.42                                                                                                                                                                                                                                                                                                                                                                                                                                                                                                                                                                                                                                                                                                                                                                                                                                                                                                                                                                                                                                                                                                                                                                                                                                                                                                                                                                                                                                                                                                                                                                                                                                                                                                                                                                                                                                                |
| Bipolar and related disorders                                  | F06.30, F06.33, F06.34, F30.10, F30.11, F30.12, F30.13, F30.2, F30.3, F30.4, F30.8, F30.9, F31.0, F31.10, F31.11, F31.12, F31.13, F31.2, F31.30, F31.31, F31.32, F31.4, F31.5, F31.60, F31.61, F31.62, F31.63, F31.64, F31.70, F31.71, F31.72, F31.73, F31.74, F31.75, F31.76, F31.77, F31.78, F31.81, F31.89, F31.9, F34.0, F34.8, F34.81, F34.89, F34.9, F39                                                                                                                                                                                                                                                                                                                                                                                                                                                                                                                                                                                                                                                                                                                                                                                                                                                                                                                                                                                                                                                                                                                                                                                                                                                                                                                                                                                                                                                                                                                                                                                                                                                        |
| Anxiety and fear-related disorders                             | F06.4, F40.00, F40.01, F40.02, F40.10, F40.11, F40.210, F40.218, F40.220, F40.228, F40.230, F40.231, F40.232, F40.233, F40.240, F40.241, F40.242, F40.243, F40.248, F40.290, F40.291, F40.298, F40.8, F40.9, F41.0, F41.1, F41.3, F41.8, F41.9, F93.0, F94.0                                                                                                                                                                                                                                                                                                                                                                                                                                                                                                                                                                                                                                                                                                                                                                                                                                                                                                                                                                                                                                                                                                                                                                                                                                                                                                                                                                                                                                                                                                                                                                                                                                                                                                                                                          |
| Obsessive-compulsive and related disorders                     | F42, F42.2, F42.3, F42.4, F42.8, F42.9, F45.22, F63.3                                                                                                                                                                                                                                                                                                                                                                                                                                                                                                                                                                                                                                                                                                                                                                                                                                                                                                                                                                                                                                                                                                                                                                                                                                                                                                                                                                                                                                                                                                                                                                                                                                                                                                                                                                                                                                                                                                                                                                 |
| Trauma- and stressor-related disorders                         | F43.0, F43.10, F43.11, F43.12, F43.20, F43.21, F43.22, F43.23, F43.24, F43.25, F43.29, F43.8, F43.9, F44.0, F44.1, F44.2, F44.4, F44.5, F44.6, F44.7, F44.81, F44.89, F44.9, F48.1, F94.1, F94.2                                                                                                                                                                                                                                                                                                                                                                                                                                                                                                                                                                                                                                                                                                                                                                                                                                                                                                                                                                                                                                                                                                                                                                                                                                                                                                                                                                                                                                                                                                                                                                                                                                                                                                                                                                                                                      |
| Disruptive, impulse-control and conduct disorders              | F63.1, F63.2, F63.81, F63.89, F63.9, F91.0, F91.1, F91.2, F91.3, F91.8, F91.9                                                                                                                                                                                                                                                                                                                                                                                                                                                                                                                                                                                                                                                                                                                                                                                                                                                                                                                                                                                                                                                                                                                                                                                                                                                                                                                                                                                                                                                                                                                                                                                                                                                                                                                                                                                                                                                                                                                                         |
| Personality disorders                                          | F07.0, F21, F60.0, F60.1, F60.2, F60.3, F60.4, F60.5, F60.6, F60.7, F60.81, F60.89, F60.9, F68.8, F69                                                                                                                                                                                                                                                                                                                                                                                                                                                                                                                                                                                                                                                                                                                                                                                                                                                                                                                                                                                                                                                                                                                                                                                                                                                                                                                                                                                                                                                                                                                                                                                                                                                                                                                                                                                                                                                                                                                 |
| Feeding and eating disorders                                   | F50.00, F50.01, F50.02, F50.2, F50.8, F50.81, F50.82, F50.89, F50.9, F98.21, F98.29, F98.3                                                                                                                                                                                                                                                                                                                                                                                                                                                                                                                                                                                                                                                                                                                                                                                                                                                                                                                                                                                                                                                                                                                                                                                                                                                                                                                                                                                                                                                                                                                                                                                                                                                                                                                                                                                                                                                                                                                            |
| Somatic disorders                                              | F45.0, F45.1, F45.20, F45.21, F45.29, F45.41, F45.42, F45.8, F45.9, F68.10, F68.11, F68.12, F68.13, F68.A                                                                                                                                                                                                                                                                                                                                                                                                                                                                                                                                                                                                                                                                                                                                                                                                                                                                                                                                                                                                                                                                                                                                                                                                                                                                                                                                                                                                                                                                                                                                                                                                                                                                                                                                                                                                                                                                                                             |
| Suicidal ideation<br>Suicide attempt<br>Intentional self-harm* | R45.851, R45.88, T14.91, T14.91X, T36.0X2, T36.1X2, T36.2X2, T36.3X2, T36.4X2, T36.5X2, T36.6X2, T36.7X2, T36.8X2, T36.92X, T37.0X2, T37.1X2, T37.2X2, T37.3X2, T37.4X2, T37.5X2, T37.8X2, T37.92X, T38.0X2, T38.1X2, T38.2X2, T38.3X2, T38.4X2, T38.5X2, T38.6X2, T38.7X2, T38.802, T38.812, T38.892, T38.902, T38.992, T39.012, T39.092, T39.1X2, T39.2X2, T39.312, T39.392, T39.4X2, T39.8X2, T39.92X, T40.0X2, T40.1X2, T40.2X2, T40.3X2, T40.412, T40.422, T40.492, T40.4X2, T40.5X2, T40.602, T40.692, T40.712, T40.722, T40.7X2, T40.8X2, T40.902, T40.992, T41.0X2, T41.1X2, T41.202, T41.292, T41.3X2, T41.42X, T41.5X2, T42.0X2, T42.1X2, T42.2X2, T42.3X2, T42.4X2, T42.5X2, T42.6X2, T42.72X, T42.8X2, T43.012, T43.022, T43.1X2, T43.202, T43.212, T43.222, T43.292, T43.3X2, T43.4X2, T43.502, T43.592, T43.602, T43.612, T43.622, T43.632, T43.642, T43.692, T43.8X2, T43.92X, T44.0X2, T44.1X2, T44.2X2, T44.3X2, T44.4X2, T44.5X2, T44.6X2, T44.7X2, T44.8X2, T44.902, T44.992, T45.0X2, T45.1X2, T45.2X2, T45.3X2, T45.4X2, T45.512, T45.522, T45.602, T45.612, T45.622, T45.692, T45.7X2, T45.8X2, T45.92X, T46.0X2, T46.1X2, T46.2X2, T46.3X2, T46.4X2, T46.5X2, T46.6X2, T46.7X2, T46.8X2, T46.902, T46.992, T47.0X2, T47.1X2, T47.2X2, T47.3X2, T47.4X2, T47.5X2, T47.6X2, T47.7X2, T47.8X2, T47.92X, T48.0X2, T48.1X2, T48.202, T48.292, T48.3X2, T48.4X2, T48.5X2, T48.6X2, T48.902, T48.992, T49.0X2, T49.1X2, T49.2X2, T49.3X2, T49.4X2, T49.5X2, T49.6X2, T49.7X2, T49.8X2, T49.92X, T50.0X2, T50.1X2, T50.2X2, T50.3X2, T50.4X2, T50.5X2, T50.6X2, T50.7X2, T50.8X2, T50.902, T50.912, T50.992, T50.A12, T50.A22, T50.A92, T50.B12, T50.B92, T50.Z12, T50.Z92, T51.0X2, T51.1X2, T51.2X2, T51.3X2, T51.8X2, T51.92X, T52.0X2, T52.1X2, T52.2X2, T52.3X2, T52.4X2, T52.8X2, T52.92X, T53.0X2, T53.1X2, T53.2X2, T53.3X2, T53.4X2, T53.5X2, T53.6X2, T53.7X2, T53.92X, T54.0X2, T54.1X2, T54.2X2, T54.3X2, T54.92X, T55.0X2, T55.1X2, T56.0X2, T56.1X2, T56.2X2, T56.3X2, T56.4X2, T56.5X2, |

| Diagnosis Category                                       | Included ICD-10-CM Codes                                                                                                                                                                                                                                                                                                                                                                                                                                                                                                                                                                                                                                                                                                                                                                                                                                                                                                                                                                                                                                                                                                                                                                                                                                                                                                                                                                             |
|----------------------------------------------------------|------------------------------------------------------------------------------------------------------------------------------------------------------------------------------------------------------------------------------------------------------------------------------------------------------------------------------------------------------------------------------------------------------------------------------------------------------------------------------------------------------------------------------------------------------------------------------------------------------------------------------------------------------------------------------------------------------------------------------------------------------------------------------------------------------------------------------------------------------------------------------------------------------------------------------------------------------------------------------------------------------------------------------------------------------------------------------------------------------------------------------------------------------------------------------------------------------------------------------------------------------------------------------------------------------------------------------------------------------------------------------------------------------|
|                                                          | T56.6X2, T56.7X2, T56.812, T56.892, T56.92X, T57.0X2, T57.1X2, T57.2X2, T57.3X2, T57.8X2, T57.92X, T58.02X, T58.12X, T58.2X2, T58.8X2, T58.92X, T59.0X2, T59.1X2, T59.2X2, T59.3X2, T59.4X2, T59.5X2, T59.6X2, T59.7X2, T59.812, T59.892, T59.92X, T60.0X2, T60.1X2, T60.2X2, T60.3X2, T60.4X2, T60.8X2, T60.92X, T61.02X, T61.12X, T61.772, T61.782, T61.8X2, T61.92X, T62.0X2, T62.1X2, T62.2X2, T62.8X2, T62.92X, T63.002, T63.012, T63.022, T63.032, T63.042, T63.062, T63.072, T63.082, T63.092, T63.112, T63.122, T63.192, T63.2X2, T63.302, T63.312, T63.322, T63.332, T63.392, T63.412, T63.422, T63.432, T63.442, T63.452, T63.462, T63.482, T63.512, T63.592, T63.612, T63.622, T63.632, T63.692, T63.712, T63.792, T63.812, T63.822, T63.832, T63.892, T63.92X, T64.02X, T64.82X, T65.0X2, T65.1X2, T65.212, T65.222, T65.292, T65.3X2, T65.4X2, T65.5X2, T65.6X2, T65.812, T65.822, T65.832, T65.892, T65.92X, T71.112, T71.122, T71.132, T71.152, T71.162, T71.192, T71.222, T71.232, X71.0XX, X71.1XX, X71.2XX, X71.3XX, X71.8XX, X71.9XX, X72.XXX, X73.0XX, X73.1XX, X73.2XX, X73.8XX, X73.9XX, X74.01X, X74.02X, X74.09X, X74.8XX, X74.9XX, X75.XXX, X76.XXX, X77.0XX, X77.1XX, X77.2XX, X77.3XX, X77.8XX, X77.9XX, X78.0XX, X78.1XX, X78.2XX, X78.8XX, X78.9XX, X79.XXX, X80.XXX, X81.0XX, X81.1XX, X81.8XX, X82.0XX, X82.1XX, X82.2XX, X82.8XX, X83.0XX, X83.1XX, X83.2XX, X83.8XX |
| Miscellaneous mental and behavioral disorders/conditions | F06.8, F07.9, F09, F48.8, F48.9, F52.0, F5.21, F52.21, F52.22, F52.31, F52.32, F52.4, F52.5, F52.6, F52.8, F529, F53, F53.0, F53.1, F54, F59, F63.0, F64.0, F64.1, F64.2, F64.8, F64.9, F65.0, F65.1, F65.2, F65.3, F65.4, F65.50, F65.51, F65.52, F65.81, F65.89, F65.9, F66, F93.8, F93.9, F98.9, F99, O90.6, O99.340, O99.341, O99.342, O99.343, O99.344, O99.345, R37                                                                                                                                                                                                                                                                                                                                                                                                                                                                                                                                                                                                                                                                                                                                                                                                                                                                                                                                                                                                                            |
| Neurodevelopmental disorders                             | F70, F71, F72, F73, F78, F78.A1, F78.A9, F79, F80.0, F80.1, F80.2, F80.4, F80.81, F80.82, F80.89, F80.9, F8.10, F81.2, F81.81, F81.89, F81.9, F82, F84.0, F84.2, F84.3, F84.5, F84.8, F84.9, F88, F89, F90.0, F90.1, F90.2, F90.8, F90.9, F94.8, F94.9, F95.0, F95.1, F95.2, F95.8, F95.9, F98.4, F98.5, F98.8                                                                                                                                                                                                                                                                                                                                                                                                                                                                                                                                                                                                                                                                                                                                                                                                                                                                                                                                                                                                                                                                                       |

\*Includes initial encounters (A), subsequent encounters (D), and sequela of (S) intentional self-harm poisoning codes - A, D, or S as the 7th character

**Table S2. Results from Linear Regression Model of ED Throughput Times with Triage Acuity Partial Effects**

| Throughput Times                    | ED Length of Stay |           | ED Wait Time |           | ED Boarding Time<br>(Admits & Transfers Only) |           |
|-------------------------------------|-------------------|-----------|--------------|-----------|-----------------------------------------------|-----------|
|                                     | Coefficient       | Robust SE | Coefficient  | Robust SE | Coefficient                                   | Robust SE |
| <b>Explanatory Variables</b>        |                   |           |              |           |                                               |           |
| Non-Psych Ped Daily Demand          | 0.094             | 0.145     | 0.000        | 0.003     | 1.067*                                        | 0.442     |
| Adult Psych Daily Demand            | 0.119             | 0.120     | 0.002        | 0.003     | 0.407                                         | 0.329     |
| Ped Psych Daily Demand              | 0.349             | 0.447     | 0.004        | 0.013     | 2.024                                         | 1.269     |
| ED Occupancy Rate                   | 0.010             | 0.037     | 0.009***     | 0.001     | -0.004                                        | 0.104     |
| <b>Academic Site Partial Effect</b> |                   |           |              |           |                                               |           |
| Non-Psych Ped Daily Demand          | -0.189            | 0.325     | 0.036***     | 0.007     | -0.195                                        | 0.612     |
| Adult Psych Daily Demand            | -0.622*           | 0.296     | -0.004       | 0.007     | -0.616                                        | 0.493     |
| Ped Psych Daily Demand              | 3.149***          | 0.923     | 0.098***     | 0.024     | 3.430                                         | 1.830     |
| ED Occupancy Rate                   | -0.046            | 0.087     | 0.001        | 0.002     | -0.033                                        | 0.158     |
| <b>Age</b>                          |                   |           |              |           |                                               |           |
| 5-8                                 | -1.065            | 1.567     | -0.021       | 0.042     | 3.542                                         | 5.603     |
| 9-12                                | 1.606             | 1.409     | -0.007       | 0.036     | 3.186                                         | 2.948     |
| 13-15                               | -0.138            | 1.104     | -0.040       | 0.031     | -1.730                                        | 2.143     |
| 16-17                               | Reference         | Reference | Reference    | Reference | Reference                                     | Reference |
| <b>Sex (Male)</b>                   | -0.353            | 1.051     | -0.018       | 0.027     | 2.813                                         | 2.021     |
| <b>Race</b>                         |                   |           |              |           |                                               |           |
| White or Caucasian                  | Reference         | Reference | Reference    | Reference | Reference                                     | Reference |
| African American                    | 0.290             | 1.242     | 0.054        | 0.029     | -2.922                                        | 2.733     |
| Other                               | 2.025             | 2.347     | -0.016       | 0.039     | -8.750***                                     | 2.635     |
| <b>Hispanic/Latino</b>              | -3.956            | 2.173     | 0.023        | 0.044     | 3.209                                         | 3.173     |
| <b>Insurance</b>                    |                   |           |              |           |                                               |           |
| Commercial                          | -4.716***         | 1.162     | 0.025        | 0.030     | -6.649**                                      | 2.241     |
| Medicaid                            | Reference         | Reference | Reference    | Reference | Reference                                     | Reference |
| Tricare/Medicare/Other              | -6.548***         | 1.805     | -0.061       | 0.053     | -10.554*                                      | 4.491     |
| None Listed                         | 0.152             | 2.258     | 0.036        | 0.063     | -8.700                                        | 4.640     |
| <b>Mode of Arrival</b>              |                   |           |              |           |                                               |           |
| Ambulance/Flight                    | 0.922             | 1.403     | -0.344***    | 0.035     | -4.468                                        | 2.426     |
| Walk-In                             | Reference         | Reference | Reference    | Reference | Reference                                     | Reference |
| Police                              | 25.568***         | 2.965     | 0.158**      | 0.059     | 14.367***                                     | 3.445     |
| <b>Arrival Time</b>                 |                   |           |              |           |                                               |           |
| Overnight (12am-5:59am)             | -3.400            | 1.784     | -0.324***    | 0.038     | -7.504*                                       | 3.041     |
| Morning (6am-11:59am)               | -2.688*           | 1.193     | -0.371***    | 0.032     | -3.778                                        | 2.947     |
| Afternoon (12pm-5:59pm)             | -0.302            | 1.151     | -0.179***    | 0.029     | -0.656                                        | 2.450     |
| Evening (6pm-11:59pm)               | Reference         | Reference | Reference    | Reference | Reference                                     | Reference |
| <b>Weekend Visits</b>               | -1.236            | 1.150     | -0.168***    | 0.026     | -0.484                                        | 2.995     |
| <b>Acuity</b>                       |                   |           |              |           |                                               |           |
| Emergent                            | 28.146***         | 1.854     | 0.192**      | 0.069     | 63.544***                                     | 9.498     |

| Throughput Times                    | ED Length of Stay |           | ED Wait Time |           | ED Boarding Time<br>(Admits & Transfers Only) |           |
|-------------------------------------|-------------------|-----------|--------------|-----------|-----------------------------------------------|-----------|
|                                     | Coefficient       | Robust SE | Coefficient  | Robust SE | Coefficient                                   | Robust SE |
| <b>Explanatory Variables</b>        |                   |           |              |           |                                               |           |
| Urgent                              | 5.269***          | 0.741     | 0.336***     | 0.063     | 38.231***                                     | 8.608     |
| Less Urgent                         | 1.009             | 0.535     | 0.109        | 0.060     | 40.419***                                     | 9.478     |
| Non-Urgent                          | Reference         | Reference | Reference    | Reference | Reference                                     | Reference |
| <b>Academic Site Partial Effect</b> |                   |           |              |           |                                               |           |
| Emergent                            | 12.418***         | 2.505     | 0.404**      | 0.138     | -24.292*                                      | 11.303    |
| Urgent                              | 4.850**           | 1.780     | -0.310*      | 0.133     | -32.054**                                     | 10.746    |
| Less Urgent                         | 0.866             | 1.477     | -0.097       | 0.134     | -36.348**                                     | 11.873    |
| Non-Urgent                          | -                 | -         | -            | -         | -                                             | -         |
| <b>Neurodev. Comorbidity</b>        | 10.966***         | 1.163     | -0.029       | 0.030     | 10.484***                                     | 2.117     |
| <b>Discharge Disposition</b>        |                   |           |              |           |                                               |           |
| Admit                               | -3.960*           | 1.755     | -0.061       | 0.042     | -                                             | -         |
| Discharge                           | Reference         | Reference | Reference    | Reference | -                                             | -         |
| Transfer                            | 14.658***         | 2.102     | 0.123*       | 0.049     | -                                             | -         |
| <b>Hospital Site</b>                |                   |           |              |           |                                               |           |
| Site A                              | Reference         | Reference | Reference    | Reference | Reference                                     | Reference |
| Site B                              | -15.903           | 12.340    | 0.669        | 0.371     | -39.607                                       | 23.476    |
| Site C                              | -11.627           | 12.222    | 0.516        | 0.372     | -21.435                                       | 22.606    |
| Site D                              | -11.843           | 12.462    | 0.623        | 0.368     | -27.623                                       | 25.530    |
| Site E                              | -16.274           | 12.141    | 1.863***     | 0.370     | -44.099                                       | 23.379    |
| Site F                              | -20.865           | 12.205    | 1.208**      | 0.373     | -43.780                                       | 23.098    |
| Site G                              | -17.485           | 12.192    | 0.770*       | 0.371     | -40.799                                       | 23.593    |
| Site H                              | -17.985           | 12.230    | 0.565        | 0.373     | -53.256*                                      | 24.847    |
| <b>Mar-Dec 2020 (PHE)</b>           | -1.429            | 2.848     | -0.158*      | 0.064     | -5.131                                        | 5.360     |
| <b>Visit Year</b>                   |                   |           |              |           |                                               |           |
| 2018                                | Reference         | Reference | Reference    | Reference | Reference                                     | Reference |
| 2019                                | 3.728***          | 0.975     | -0.006       | 0.030     | 7.985**                                       | 2.461     |
| 2020                                | 10.768***         | 2.429     | 0.093        | 0.055     | 18.828***                                     | 4.794     |
| <b>Constant</b>                     | 0.550             | 11.497    | -0.504       | 0.340     | -22.331                                       | 18.552    |
| <b>N</b>                            | 12487             |           | 12487        |           | 3630                                          |           |
| <b>R^2</b>                          | 0.153             |           | 0.121        |           | 0.100                                         |           |

**Legend:** \*p<0.05, \*\*p<0.01, \*\*\*p<0.001

**Notes:** Academic Site Partial Effects are the coefficients resulting from interaction terms between the ED demand variables and an academic site indicator, as well as the triage acuity variable and the academic site indicator. The academic ED site indicator was not included in the model due to collinearity with the hospital site indicators. The ED Occupancy Rate variable was calculated by dividing the daily ED volume by the historical daily average ED volume at the same ED site on the same day of the week over the 30 days prior to the observed visit date. The majority of patients in the Tricare/Medicare/Other insurance group had Tricare. SE=Standard Error, Neurodev = Neurodevelopmental, PHE=Public Health Emergency (COVID-19 Pandemic)

**Table S3. Marginal Effects from 3-Outcome Multinomial Logit Model Predicting ED Disposition Among Pediatric Psychiatric ED Visits from 2018-2020**

| Explanatory Variables                               | Outcome 1 - Admission |                 |                  | Outcome 2 - Discharge |                 |                 | Outcome 3 - Transfer |                 |                  |
|-----------------------------------------------------|-----------------------|-----------------|------------------|-----------------------|-----------------|-----------------|----------------------|-----------------|------------------|
|                                                     | Point Estimate        | Delta-Method SE | 95% CI           | Point Estimate        | Delta-Method SE | 95% CI          | Point Estimate       | Delta-Method SE | 95% CI           |
| <b>Average Marginal Effects For Community Sites</b> |                       |                 |                  |                       |                 |                 |                      |                 |                  |
| Non-Psych Ped Daily Demand                          | -0.000                | 0.001           | [-0.002, 0.002]  | 0.002                 | 0.001           | [-0.001, 0.004] | -0.001               | 0.001           | [-0.003, 0.001]  |
| Adult Psych Daily Demand                            | -0.002                | 0.001           | [-0.003, 0.000]  | 0.003**               | 0.001           | [0.001, 0.005]  | -0.001               | 0.001           | [-0.003, 0.000]  |
| Ped Psych Daily Demand                              | -0.007                | 0.005           | [-0.017, 0.002]  | 0.001                 | 0.006           | [-0.011, 0.013] | 0.006                | 0.005           | [-0.003, 0.015]  |
| ED Occupancy Rate                                   | -0.000                | 0.000           | [-0.001, 0.001]  | -0.000                | 0.000           | [-0.001, 0.000] | 0.001                | 0.000           | [-0.000, 0.001]  |
| <b>Average Marginal Effects Academic ED Sites</b>   |                       |                 |                  |                       |                 |                 |                      |                 |                  |
| Non-Psych Ped Daily Demand                          | -0.004**              | 0.001           | [-0.007, -0.003] | 0.004*                | 0.002           | [0.000, 0.008]  | 0.000                | 0.001           | [-0.003, 0.003]  |
| Non-Ped Psych Daily Demand                          | 0.001                 | 0.001           | [-0.001, 0.004]  | -0.000                | 0.002           | [-0.004, 0.003] | -0.001               | 0.001           | [-0.003, 0.001]  |
| Ped Psych Daily Demand                              | -0.007*               | 0.003           | [-0.013, -0.000] | 0.006                 | 0.004           | [-0.003, 0.015] | 0.001                | 0.004           | [-0.006, 0.008]  |
| ED Occupancy Rate                                   | 0.001                 | 0.000           | [-0.000, 0.001]  | -0.001                | 0.001           | [-0.002, 0.000] | 0.000                | 0.000           | [-0.001, 0.001]  |
| <b>Average Marginal Effects Across All ED Sites</b> |                       |                 |                  |                       |                 |                 |                      |                 |                  |
| <b>Academic Indicator</b>                           | 0.113                 | 0.076           | [-0.035, 0.261]  | -0.076                | 0.100           | [-0.272, 0.120] | -0.037               | 0.083           | [-0.199, 0.126]  |
| <b>Age</b>                                          |                       |                 |                  |                       |                 |                 |                      |                 |                  |
| 5-8                                                 | 0.012                 | 0.012           | [-0.011, 0.034]  | 0.036*                | 0.014           | [0.008, 0.063]  | -0.047***            | 0.011           | [-0.068, -0.026] |
| 9-12                                                | -0.006                | 0.008           | [-0.022, 0.010]  | 0.019                 | 0.010           | [-0.000, 0.039] | -0.014               | 0.008           | [-0.029, 0.001]  |
| 13-15                                               | -0.012                | 0.007           | [-0.026, 0.002]  | -0.013                | 0.009           | [-0.031, 0.004] | 0.025***             | 0.007           | [0.012, 0.039]   |
| 16-17                                               | Reference             | Reference       | Reference        | Reference             | Reference       | Reference       | Reference            | Reference       | Reference        |
| <b>Sex (Male)</b>                                   | -0.019**              | 0.006           | [-0.031, -0.007] | 0.029***              | 0.008           | [0.014, 0.044]  | -0.010               | 0.006           | [-0.022, 0.001]  |
| <b>Race</b>                                         |                       |                 |                  |                       |                 |                 |                      |                 |                  |
| White or Caucasian                                  | Reference             | Reference       | Reference        | Reference             | Reference       | Reference       | Reference            | Reference       | Reference        |
| African American                                    | -0.001                | 0.007           | [-0.016, 0.013]  | 0.018*                | 0.009           | [0.001, 0.035]  | -0.017*              | 0.007           | [-0.030, -0.003] |
| Other                                               | 0.002                 | 0.010           | [-0.017, 0.021]  | 0.020                 | 0.013           | [-0.005, 0.045] | -0.022*              | 0.010           | [-0.042, -0.003] |
| <b>Hispanic/Latino</b>                              | -0.001                | 0.011           | [-0.022, 0.020]  | -0.009                | 0.014           | [-0.038, 0.019] | 0.011                | 0.012           | [-0.013, 0.034]  |
| <b>Insurance</b>                                    |                       |                 |                  |                       |                 |                 |                      |                 |                  |
| Commercial                                          | 0.001                 | 0.007           | [-0.012, 0.014]  | -0.015                | 0.009           | [-0.031, 0.002] | 0.014*               | 0.007           | [0.000, 0.027]   |

| Explanatory Variables        | Outcome 1 - Admission |                 |                  | Outcome 2 - Discharge |                 |                  | Outcome 3 - Transfer |                 |                  |
|------------------------------|-----------------------|-----------------|------------------|-----------------------|-----------------|------------------|----------------------|-----------------|------------------|
|                              | Point Estimate        | Delta-Method SE | 95% CI           | Point Estimate        | Delta-Method SE | 95% CI           | Point Estimate       | Delta-Method SE | 95% CI           |
| Medicaid                     | Reference             | Reference       | Reference        | Reference             | Reference       | Reference        | Reference            | Reference       | Reference        |
| Tricare/Medicare/Other       | 0.037*                | 0.015           | [0.007, 0.067]   | -0.043*               | 0.019           | [-0.081, -0.006] | 0.007                | 0.016           | [-0.025, 0.038]  |
| None Listed                  | -0.017                | 0.015           | [-0.045, 0.012]  | 0.098***              | 0.017           | [0.065, 0.130]   | -0.081***            | 0.010           | [-0.100, -0.062] |
| <b>Mode of Arrival</b>       |                       |                 |                  |                       |                 |                  |                      |                 |                  |
| Ambulance/Flight             | 0.060***              | 0.009           | [0.042, 0.077]   | -0.070***             | 0.011           | [-0.091, -0.049] | 0.011                | 0.009           | [-0.006, 0.027]  |
| Walk-In                      | Reference             | Reference       | Reference        | Reference             | Reference       | Reference        | Reference            | Reference       | Reference        |
| Police                       | -0.002                | 0.012           | [-0.024, 0.021]  | -0.016                | 0.012           | [-0.040, 0.008]  | 0.018*               | 0.008           | [0.002, 0.034]   |
| <b>Arrival Time</b>          |                       |                 |                  |                       |                 |                  |                      |                 |                  |
| Overnight (12am-5:59am)      | 0.042***              | 0.012           | [0.019, 0.065]   | -0.065***             | 0.014           | [-0.092, -0.038] | 0.023*               | 0.011           | [0.002, 0.044]   |
| Morning (6am-11:59am)        | 0.010                 | 0.008           | [-0.007, 0.026]  | 0.002                 | 0.010           | [-0.018, 0.023]  | -0.012               | 0.008           | [-0.028, 0.004]  |
| Afternoon (12pm-5:59pm)      | 0.012                 | 0.007           | [-0.001, 0.025]  | -0.020*               | 0.008           | [-0.036, -0.004] | 0.008                | 0.006           | [-0.005, 0.020]  |
| Evening (6pm-11:59pm)        | Reference             | Reference       | Reference        | Reference             | Reference       | Reference        | Reference            | Reference       | Reference        |
| <b>Weekend Visits</b>        | -0.006                | 0.008           | [-0.020, 0.009]  | 0.008                 | 0.009           | [-0.010, 0.026]  | -0.002               | 0.007           | [-0.016, 0.012]  |
| <b>Acuity</b>                |                       |                 |                  |                       |                 |                  |                      |                 |                  |
| Emergent                     | 0.191***              | 0.007           | [0.177, 0.206]   | -0.451***             | 0.010           | [-0.471, -0.431] | 0.260***             | 0.008           | [0.244, 0.276]   |
| Urgent                       | 0.154***              | 0.008           | [0.139, 0.169]   | -0.192***             | 0.010           | [-0.211, -0.174] | 0.038***             | 0.006           | [0.026, 0.049]   |
| Less Urgent                  | 0.018**               | 0.007           | [0.005, 0.031]   | -0.022**              | 0.008           | [-0.038, -0.006] | 0.004                | 0.005           | [-0.007, 0.014]  |
| Non-Urgent                   | Reference             | Reference       | Reference        | Reference             | Reference       | Reference        | Reference            | Reference       | Reference        |
| <b>Neurodev. Comorbidity</b> | -0.000                | 0.006           | [-0.013, 0.012]  | 0.021**               | 0.008           | [0.006, 0.037]   | -0.021**             | 0.006           | [-0.033, -0.009] |
| <b>Hospital Site</b>         |                       |                 |                  |                       |                 |                  |                      |                 |                  |
| Site A                       | Reference             | Reference       | Reference        | Reference             | Reference       | Reference        | Reference            | Reference       | Reference        |
| Site B                       | -0.179*               | 0.070           | [-0.316, -0.43]  | 0.132                 | 0.100           | [-0.063, 0.328]  | 0.047                | 0.086           | [-0.121, 0.215]  |
| Site C                       | -0.135                | 0.088           | [-0.308, 0.038]  | 0.119                 | 0.103           | [-0.084, 0.321]  | 0.016                | 0.078           | [-0.136, 0.169]  |
| Site D                       | -0.201***             | 0.056           | [-0.310, -0.092] | 0.075                 | 0.103           | [-0.126, 0.277]  | 0.126                | 0.095           | [-0.060, 0.312]  |
| Site E                       | -0.067                | 0.114           | [-0.290, 0.156]  | 0.000                 | 0.115           | [-0.226, 0.226]  | 0.067                | 0.087           | [-0.104, 0.237]  |
| Site F                       | -0.043                | 0.119           | [-0.277, 0.191]  | 0.066                 | 0.119           | [-0.168, 0.300]  | -0.023               | 0.068           | [-0.156, 0.111]  |
| Site G                       | -0.109                | 0.103           | [-0.310, 0.093]  | 0.092                 | 0.111           | [-0.127, 0.310]  | 0.017                | 0.079           | [-0.137, 0.171]  |

| Explanatory Variables | Outcome 1 - Admission |                 |                  | Outcome 2 - Discharge |                 |                 | Outcome 3 - Transfer |                 |                 |
|-----------------------|-----------------------|-----------------|------------------|-----------------------|-----------------|-----------------|----------------------|-----------------|-----------------|
|                       | Point Estimate        | Delta-Method SE | 95% CI           | Point Estimate        | Delta-Method SE | 95% CI          | Point Estimate       | Delta-Method SE | 95% CI          |
| Site H                | -0.150                | 0.087           | [-0.320, 0.020]  | 0.043                 | 0.112           | [-0.176, 0.262] | 0.107                | 0.097           | [-0.083, 0.297] |
| Mar-Dec 2020 (PHE)    | -0.037**              | 0.013           | [-0.062, -0.012] | 0.028                 | 0.017           | [-0.005, 0.061] | 0.009                | 0.013           | [-0.017, 0.035] |
| Visit Year            |                       |                 |                  |                       |                 |                 |                      |                 |                 |
| 2018                  | Reference             | Reference       | Reference        | Reference             | Reference       | Reference       | Reference            | Reference       | Reference       |
| 2019                  | -0.020**              | 0.007           | [-0.034, -0.006] | 0.013                 | 0.009           | [-0.005, 0.031] | 0.007                | 0.007           | [-0.007, 0.021] |
| 2020                  | -0.010                | 0.012           | [-0.034, 0.013]  | -0.005                | 0.015           | [-0.035, 0.024] | 0.016                | 0.012           | [-0.007, 0.038] |
| N                     | 12,487                |                 |                  | 12,487                |                 |                 | 12,487               |                 |                 |
| Pseudo R <sup>2</sup> | 0.279                 |                 |                  | 0.279                 |                 |                 | 0.279                |                 |                 |

**Legend:** \*p<0.05, \*\*p<0.01, \*\*\*p<0.001

**Notes:** The ED Occupancy Rate variable was calculated by dividing the daily ED volume by the historical daily average ED volume at the same ED site on the same day of the week over the 30 days prior to the observed visit date. The logit model included interaction terms between the ED demand variables and an academic site indicator. Academic and Non-Academic site AMEs were calculated for the interacted demand variables by holding the academic indicator either equal to 1 or 0. The majority of patients in the Tricare/Medicare/Other insurance group had Tricare. CI = Confidence Interval, Neurodev = Neurodevelopmental, PHE=Public Health Emergency (COVID-19 Pandemic), SE=Standard Error.
